# Supplementary material
Source: PubMed Central journal article supplement (PMC9166338)
Supplement: JCOPDF-9-277-s001.pdf [file JCOPDF-9-277-s001.pdf]

## Online Supplement

### Patient-Driven Research Agenda: What Needs to be Studied in Those Living with COPD During the Coronavirus Disease 2019 Pandemic

Gretchen McCreary, MS; Danielle Boyce, MPH; Mary Ellen Houlihan; Jean Rommes; Carol Rubin; Karen Deitemeyer; William Clark; Cara Pasquale, MPH; Richard Mularski, MD; Elisha Malanga, BS; Barbara P. Yawn, MD, MSc

#### Supplementary Table S1. COPD & Coping with COVID Pandemic Survey

**1. Do you consider yourself:** *(check all that apply)*

- Patient with COPD, bronchiectasis and/or NTM
- HCP
- Caregiver
- Other option:

**2. What is your age:**

- Less than 40
- 40-49
- 50-59
- 60-69
- 70-79
- 80 or older

**3. Do you consider yourself a:**

- Female
- Male
- Other (please specify - optional)
- Prefer not to Answer

**Activities- Your usual activities and personal care needs**

How has the COVID pandemic affected your level of concern, worry or anxiety about each of the things you may need or want to do? *(Please select the best answer for each line)*

| <b>Issues</b>                                                                                                    | <b>Caused me to be very concerned, worried or anxious</b> | <b>Caused me some increased concern, worry or anxiety</b> | <b>No change</b> | <b>Not applicable</b> |
|------------------------------------------------------------------------------------------------------------------|-----------------------------------------------------------|-----------------------------------------------------------|------------------|-----------------------|
| <b>Getting groceries or meals (a)</b>                                                                            |                                                           |                                                           |                  |                       |
| <b>Doing or getting personal care such as bathing or hair care or getting laundry done (b)</b>                   |                                                           |                                                           |                  |                       |
| <b>Doing exercise or activity (c)</b>                                                                            |                                                           |                                                           |                  |                       |
| <b>Attending functions such as family celebrations, social gatherings, club meetings, religious services (d)</b> |                                                           |                                                           |                  |                       |

|                                                           |  |  |  |  |
|-----------------------------------------------------------|--|--|--|--|
| Doing volunteering or working outside my home (e)         |  |  |  |  |
| Not being with ill or dying friends or family members (f) |  |  |  |  |
| Doing online shopping for basic needs(g)                  |  |  |  |  |

4. Are there other concerns or worries about your usual activities and personal care? \_\_\_\_\_

**Living Situations:**

How has the COVID pandemic affected your level of concern, worry or anxiety about any changes to your living situation and/or taking care of your home? *(Please select best answer in each row)*

| Issues                                                                   | Caused me to be very concerned, worried or anxious | Caused me some increased concern, worry or anxiety | No change | Not applicable |
|--------------------------------------------------------------------------|----------------------------------------------------|----------------------------------------------------|-----------|----------------|
| Care of your home, inside or out, like cleaning, yardwork or repairs (a) |                                                    |                                                    |           |                |

|                                                                                            |  |  |  |  |
|--------------------------------------------------------------------------------------------|--|--|--|--|
| Living arrangements:<br>Having to move, or<br>have family or others<br>move in with me (b) |  |  |  |  |
| Getting mail or online<br>purchases delivered to<br>my door & signing for<br>them (c)      |  |  |  |  |
| Trying to do work or<br>help others do work or<br>schoolwork from<br>home (d)              |  |  |  |  |

5. Are there other concerns or worries when it comes to your living situation? \_\_\_\_\_

**Health care use & Self-management:**

How has the COVID pandemic affected your level of concern, worry or anxiety regarding **getting medicines, health care, oxygen and your other health care needs?** *(Please select the best answer for each line)*

| Issues | Caused me to be very<br>concerned, worried<br>or anxious | Caused me some<br>increased concern,<br>worry or anxiety | No<br>change | Not<br>applicable |
|--------|----------------------------------------------------------|----------------------------------------------------------|--------------|-------------------|
|        |                                                          |                                                          |              |                   |

|                                                                                                            |  |  |  |  |
|------------------------------------------------------------------------------------------------------------|--|--|--|--|
| <b>Getting medicine due to shortages or higher costs during this period (a)</b>                            |  |  |  |  |
| <b>Having trouble getting to pharmacy or having medicines delivered (a)</b>                                |  |  |  |  |
| <b>Concerns about risks of using nebulizer at home (a)</b>                                                 |  |  |  |  |
| <b>Fear of going to doctor's office or office not open for sick visits (b)</b>                             |  |  |  |  |
| <b>Learning to use and when and how to use telehealth (b)</b>                                              |  |  |  |  |
| <b>Cannot get tests I needed like pulmonary function or spirometry or CT scans (b)</b>                     |  |  |  |  |
| <b>Do not know what visits or tests like spirometry or "elective" procedures can be safely delayed (b)</b> |  |  |  |  |

|                                                                                                     |  |  |  |  |
|-----------------------------------------------------------------------------------------------------|--|--|--|--|
| <b>Trouble getting my home health care services (c)</b>                                             |  |  |  |  |
| <b>Fear of going to emergency room when I need to do so (d)</b>                                     |  |  |  |  |
| <b>Fear of going to hospital for my COPD because of COVID risk (d)</b>                              |  |  |  |  |
| <b>Fear of being alone if I am in hospital (d)</b>                                                  |  |  |  |  |
| <b>Cannot get or continue my pulmonary rehabilitation program or after care (e)</b>                 |  |  |  |  |
| <b>Don't know how to get or cannot find mental health services (f)</b>                              |  |  |  |  |
| <b>Uncomfortable getting mental health services in person or by telehealth (virtual visits) (f)</b> |  |  |  |  |

|                                                                  |  |  |  |  |
|------------------------------------------------------------------|--|--|--|--|
| <b>Trouble getting oxygen delivered or set up in my home (g)</b> |  |  |  |  |
| <b>Fear that I or family or friends will get COVID (h)</b>       |  |  |  |  |

6. Are there other concerns and worries you have about health-care use and self-management? \_\_\_\_\_

**Getting and interpreting data on risk, safety, suggested actions:**

How has the COVID pandemic affected your level of concern, worry or anxiety **about finding and using information about COVID?** *(Please select the best answer for each line)*

| <b>Issues</b>                                                                                                                | <b>Caused me to be very concerned, worried or anxious</b> | <b>Caused me some increased concern, worry or anxiety</b> | <b>No change</b> | <b>Not applicable</b> |
|------------------------------------------------------------------------------------------------------------------------------|-----------------------------------------------------------|-----------------------------------------------------------|------------------|-----------------------|
| <b>Where to find accurate information about my COVID risks &amp; how to prevent getting COVID, now and in the future (a)</b> |                                                           |                                                           |                  |                       |

|                                                                                              |  |  |  |  |
|----------------------------------------------------------------------------------------------|--|--|--|--|
| Understanding information after I get it and what it means for me (b)                        |  |  |  |  |
| Getting information from my doctor or office (b)                                             |  |  |  |  |
| Confusion when information and recommendations change over time or conflict (c)              |  |  |  |  |
| How to explain information and recommendations for me to people and friends without COPD (d) |  |  |  |  |
| Getting too much information—overload (e)                                                    |  |  |  |  |

7. Are there other concerns or worries about receiving or interpreting data? \_\_\_\_\_

**New Norm:**

How has the COVID pandemic affected your level of concern, worry or anxiety when you think about what might be the **new “normal” following this COVID pandemic surge?** *(Please select the best answer for each line)*



| Issues                                                                                          | Caused me to be very concerned, worried or anxious | Caused me some increased concern, worry or anxiety | No change | Not applicable |
|-------------------------------------------------------------------------------------------------|----------------------------------------------------|----------------------------------------------------|-----------|----------------|
| Knowing if I will ever be able to go out, or work or volunteer again (a)                        |                                                    |                                                    |           |                |
| Not knowing what is safe to do (a)                                                              |                                                    |                                                    |           |                |
| Not knowing how I will maintain friendships (a)                                                 |                                                    |                                                    |           |                |
| Not knowing if a vaccine will be developed, if I will be able to take it or if it will work (b) |                                                    |                                                    |           |                |
| Not knowing if I will get to do the “bucket list” I had planned (c)                             |                                                    |                                                    |           |                |
| Not knowing if I will get to visit children, grandchildren and family members (c)               |                                                    |                                                    |           |                |

|                                                                                                               |  |  |  |  |
|---------------------------------------------------------------------------------------------------------------|--|--|--|--|
| <p><b>Not knowing what my life will look like in the future (c)</b></p>                                       |  |  |  |  |
| <p><b>Not knowing if I will recover from the stress, depression or anxiety caused by the pandemic (d)</b></p> |  |  |  |  |
| <p><b>Feeling older people and their needs are being ignored (d)</b></p>                                      |  |  |  |  |

8. Do you have other concerns or worries with the “New Norm”? \_\_\_\_\_

**Coping strategies and abilities**

**Just a few final questions about coping during the COVID pandemic:**

9. How much more difficult is it to cope during the COVID pandemic? *(Give us your best answer)*

- A lot
- A little more difficult
- No change
- A little easier
- A lot easier

10. Have you been able to identify ways to cope? *(Give us your best answer)*

- Yes, several ways to cope

- Yes, a few ways
- No, could not find ways
- No, have not even tried

**11. Do you know where to find potential resources on how to cope? (check all that apply)**

- I have no idea
- I have some ideas
- I need help finding ways

**12. Do you think you need new coping strategies due to the COVID pandemic? (Give us your best answer)**

- Yes, need new ones
- No, the old ones work
- I don't even know
- I don't use coping strategies

**13. How well do you think you are currently coping? (Give us your best answer)**

- Very well
- Pretty well
- Don't know
- Not coping well
- Coping very badly

## Supplementary Table S2. All 25 topics with number of votes received

### *Daily Quality of Living*

- Getting COVID-19 on top of my COPD or other chronic lung disease affects most of my thoughts or actions. (395)
- Doing the activity or exercise I need to maintain my health, breathing ability and well-being. (330)
- Wearing masks--when and which ones to try and what to do if I cannot breathe when wearing a mask. (328)
- Getting all or enough of my COPD or other chronic lung disease medicines due to shortages, costs or trouble having them delivered or me getting to the pharmacy. (223)
- Being able to recover from or get help for the stress, depression and/or anxiety caused by the pandemic. (166)
- Continuing to do volunteer activities or work outside my home that are important to the community and to my self-worth and health. (151)
- Getting the food/meals I need to maintain my health and well-being while not putting myself at risk. (137)
- Getting personal care support that I need due to my COPD so I can maintain my health and interact with others in person or by distance such as on social media. (78)
- Being able to pay my bills due to things happening since the pandemic started including higher costs, need for more help or losing income. (77)

### *Family, Friends and Social Concerns*

- Being able to be with or attend family functions/celebrations or social gatherings. (326)
- Dying alone at home or in hospital with no one able to be with me or to allow me to say goodbye to family and friends. (151)
- Trying to explain my concerns about COPD and COVID-19 to family or friends. (84)
